# Supplementary material
Source: bioRxiv or medRxiv preprint supplement (https://medrxiv.org/highwire/filestream/77062/field_highwire_adjunct_files/0/2020.04.15.20066183-1.pdf)
Supplement: Supplementary file [file 2020.04.15.20066183-1.pdf]

**CITATIONS**  
(95% quantile: 3.45)

| ID | DOI                           | Number of citations | Title                                                                                                                                                                          | First Author | Country of first author affiliation | Journal                                      | Journal IF | Journal H-index | Publication date | Paper type                                         | Data source | Topics       | Aim of the paper                                                                                                                                              |
|----|-------------------------------|---------------------|--------------------------------------------------------------------------------------------------------------------------------------------------------------------------------|--------------|-------------------------------------|----------------------------------------------|------------|-----------------|------------------|----------------------------------------------------|-------------|--------------|---------------------------------------------------------------------------------------------------------------------------------------------------------------|
| 1  | 10.1016/S0140-6736(20)30183-5 | 82                  | Clinical features of patients infected with 2019 novel coronavirus in Wuhan, China                                                                                             | Huang C      | China                               | Lancet                                       | 43.377     | 700             | 24/1/2020        | Cohort study                                       | D.C.D       | C            | Report the epidemiological, clinical, laboratory, and radiological characteristics and treatment and clinical outcomes of patients affected by COVID-19.      |
| 2  | 10.1016/S0140-6736(20)30154-9 | 71                  | A familial cluster of pneumonia associated with the 2019 novel coronavirus indicating person-to-person transmission: a study of a family cluster.                              | Chan J       | China                               | Lancet                                       | 43.377     | 700             | 24/1/2020        | Case Report/Case Study                             | D.C.D       | E, V, C, D   | Investigate the person-to-person or nosocomial transmission of SARS-CoV-2.                                                                                    |
| 3  | 10.1016/S0140-6736(20)30211-7 | 27                  | Epidemiological and clinical characteristics of 99 cases of 2019 novel coronavirus pneumonia in Wuhan, China: a descriptive study                                              | Chen N       | China                               | Lancet                                       | 43.377     | 700             | 30/1/2020        | Cross-sectional study/Descriptive                  | D.C.D       | C, D         | Improve the knowledge about the epidemiology and clinical features of pneumonia caused by SARS-CoV-2                                                          |
| 4  | 10.1016/S0140-6736(20)30185-9 | 17                  | A novel coronavirus outbreak of global health concern                                                                                                                          | Wang C       | China                               | Lancet                                       | 43.377     | 700             | 24/1/2020        | Editorial/Comment/Letter/News/Expert opinion/Essay | R.D.        | E            | Describe the stages of the outbreak and describe clinical features of affected subjects.                                                                      |
| 5  | 10.1002/jmv.25678             | 16                  | Outbreak of pneumonia of unknown etiology in Wuhan, the mystery and the miracle                                                                                                | Lu H         | China                               | Journal of Medical Virology                  | 2.066      | 105             | 16/1/2020        | Editorial/Comment/Letter/News/Expert opinion/Essay | O.D.        | E            | Commentary about the outbreak and the similarities with other coronavirus.                                                                                    |
| 6  | 10.1016/j.ijid.2020.01.009    | 12                  | The continuing 2019-nCoV epidemic threat of novel coronaviruses to global health - The latest 2019 novel coronavirus outbreak in Wuhan, China.                                 | Hui DS       | China                               | International journal of infectious diseases | 3.420      | 73              | 14/1/2020        | Editorial/Comment/Letter/News/Expert opinion/Essay | O.D.        | GD, E, TR, P | Describe the SARS-CoV-2 outbreak in Wuhan, China                                                                                                              |
| 7  | 10.1001/JAMA.2020.0757        | 7                   | Coronavirus Infections-More Than Just the Common Cold.                                                                                                                         | Paules CI    | USA                                 | JAMA                                         | 14.777     | 622             | 23/1/2020        | Editorial/Comment/Letter/News/Expert opinion/Essay | R.D.        | GD           | Description of the outbreak, transmission, clinical symptoms and economical costs.                                                                            |
| 8  | 10.1056/NEJMc2001468          | 6                   | Transmission of 2019-nCoV Infection from an Asymptomatic Contact in Germany                                                                                                    | Rothe C      | Germany                             | New England Journal of Medicine              | 37.909     | 933             | 30/1/2020        | Case Report/Case Study                             | D.C.D       | TR           | Report a case of SARS-CoV-2 infection acquired outside Asia in which transmission appears to have occurred during the incubation period in the index patient. |
| 9  | 10.1056/NEJMoa2001017         | 6                   | A Novel Coronavirus from Patients with Pneumonia in China, 2019                                                                                                                | Zhu N        | China                               | New England Journal of Medicine              | 37.909     | 933             | 24/1/2020        | Editorial/Comment/Letter/News/Expert opinion/Essay | R.D.        | V            | Describe the use of different diagnostic methods: bronchoalveolar-lavage fluid, RNA extracted from bronchoalveolar-lavage fluid and culture supernatants.     |
| 10 | 10.1002/jmv.25681             | 4                   | Emerging coronaviruses: Genome structure, replication, and pathogenesis                                                                                                        | Chen Y       | China                               | Journal of Medical Virology                  | 2.066      | 105             | 22/1/2020        | Systematic Review/Meta Analysis/Non Systematic R   | R.D.        | V            | Perform a brief introduction of the general features of CoVs and describe diseases caused by different CoVs in humans and animals.                            |
| 11 | 10.1016/j.ijid.2020.01.050    | 4                   | Preliminary estimation of the basic reproduction number of novel coronavirus (2019-nCoV) in China, from 2019 to 2020: Adata-driven analysis in the early phase of the outbreak | Zhao Shi     | China                               | International journal of infectious diseases | 3.420      | 73              | 30/1/2020        | Other                                              | O.D.        | TR           | Estimate the transmissibility of SARS-CoV-2 via the basic reproduction number, R0, based on the limited data in the early phase of the outbreak.              |

**MENTIONS**  
(95% quantile: 66.95)

| ID | DOI                           | Number of mentions | Title                                                                                                                                               | First Author | Country of first author affiliation | Journal                     | Journal IF | Journal H-index | Publication date | Paper type                                              | Data source | Topics | Aim of the paper                                                                                                                                                  |
|----|-------------------------------|--------------------|-----------------------------------------------------------------------------------------------------------------------------------------------------|--------------|-------------------------------------|-----------------------------|------------|-----------------|------------------|---------------------------------------------------------|-------------|--------|-------------------------------------------------------------------------------------------------------------------------------------------------------------------|
| 1* | 10.1016/S0140-6736(20)30183-5 | 277                | Clinical features of patients infected with 2019 novel coronavirus in Wuhan, China                                                                  | Huang C      | China                               | Lancet                      | 43.377     | 700             | 24/1/2020        | Cohort study                                            | D.C.D       | C      | Report the epidemiological, clinical, laboratory, and radiological characteristics and treatment and clinical outcomes of patients affected by COVID-19.          |
| 12 | 10.1002/jmv.25682             | 203                | Homologous recombination within the spike glycoprotein of the newly identified coronavirus may boost cross-species transmission from snake to human | Wei J        | China                               | Journal of Medical Virology | 2.066      | 105             | 22/1/2020        | Clinical trial, RCT, in vitro or in vivo study/Genomics | D.C.D       | V      | Since many patients were potentially exposed to wildlife animals at the Wuhan seafood wholesale market, the authors want to analyse the possible virus reservoir. |

|    |                               |     |                                                                                                                                                     |            |         |                                 |        |      |           |                                                    |       |            |                                                                                                                                                                                                                                                                                                    |
|----|-------------------------------|-----|-----------------------------------------------------------------------------------------------------------------------------------------------------|------------|---------|---------------------------------|--------|------|-----------|----------------------------------------------------|-------|------------|----------------------------------------------------------------------------------------------------------------------------------------------------------------------------------------------------------------------------------------------------------------------------------------------------|
| 8* | 10.1056/NEJMc2001468          | 154 | Transmission of 2019-nCoV Infection from an Asymptomatic Contact in Germany                                                                         | Rothe C    | Germany | New England Journal of Medicine | 37.909 | 933  | 30/1/2020 | Case Report/Case Study                             | D.C.D | TR         | Report a case of SARS-CoV-2 infection acquired outside Asia in which transmission appears to have occurred during the incubation period in the index patient.                                                                                                                                      |
| 13 | 10.1056/NEJMoa2001316         | 134 | Early Transmission Dynamics in Wuhan, China, of Novel Coronavirus-Infected Pneumonia                                                                | Li Q       | China   | New England Journal of Medicine | 37.909 | 933  | 29/1/2020 | Cross-sectional study/Descriptive                  | D.C.D | E, V, TR   | Analyze the data on the first 425 confirmed cases in Wuhan to determine the epidemiologic characteristics of COVID-19.                                                                                                                                                                             |
| 14 | 10.1016/S0140-6736(20)30260-9 | 129 | Nowcasting and forecasting the potential domestic and international spread of the 2019-nCoV outbreak originating in Wuhan, China: a modelling study | Wu JT      | China   | Lancet                          | 43.377 | 700  | 31/1/2020 | Other                                              | O.D.  | E, TR      | Estimate of the size of the epidemic in Wuhan on the basis of the number of cases exported from Wuhan to cities outside mainland China and forecast the extent of the domestic and global public health risks of epidemics, accounting for social and non-pharmaceutical prevention interventions. |
| 2* | 10.1016/S0140-6736(20)30154-9 | 125 | A familial cluster of pneumonia associated with the 2019 novel coronavirus indicating person-to-person transmission: a study of a family cluster.   | Chan J     | China   | Lancet                          | 43.377 | 700  | 24/1/2020 | Case Report/Case Study                             | D.C.D | E, V, C, D | Investigate the person-to-person or nosocomial transmission of SARS-CoV-2.                                                                                                                                                                                                                         |
| 15 | 10.1001/JAMA.2020.1585        | 107 | Clinical Characteristics of 138 Hospitalized Patients With 2019 Novel Coronavirus-Infected Pneumonia in Wuhan, China.                               | Wang D     | China   | JAMA                            | 14.777 | 622  | 7/2/2020  | Case-control study                                 | D.C.D | C, T, TR   | Investigate clinical characteristics of hospitalized patients with COVID-19 in Wuhan, China                                                                                                                                                                                                        |
| 3* | 10.1016/S0140-6736(20)30211-7 | 91  | Epidemiological and clinical characteristics of 99 cases of 2019 novel coronavirus pneumonia in Wuhan, China: a descriptive study                   | Chen N     | China   | Lancet                          | 43.377 | 700  | 30/1/2020 | Cross-sectional study/Descriptive                  | D.C.D | C, D       | improve the knowledge about the epidemiology and clinical features of pneumonia caused by SARS-CoV-2                                                                                                                                                                                               |
| 16 | 10.1056/NEJMoa2001191         | 84  | First Case of 2019 Novel Coronavirus in the United States                                                                                           | Holshue ML | USA     | New England Journal of Medicine | 37.909 | 933  | 31/1/2020 | Case Report/Case Study                             | D.C.D | C, D, T    | Describe the identification, diagnosis, clinical course, and management of the case, including the patient's initial mild symptoms at presentation with progression to pneumonia, of the first case of SARS-CoV-2 infection confirmed in the USA.                                                  |
| 17 | 10.1038/s41586-020-2012-7     | 81  | A pneumonia outbreak associated with a new coronavirus of probable bat origin                                                                       | Zhou P     | China   | Nature                          | 24.365 | 1096 | 3/2/2020  | Case Report/Case Study                             | R.D.  | V, C       | Clinical case description with focus on molecular diagnostics techniques and potential use of human or horse sera containing IG                                                                                                                                                                    |
| 9* | 10.1056/NEJMoa2001017         | 73  | A Novel Coronavirus from Patients with Pneumonia in China, 2019                                                                                     | Zhu N      | China   | New England Journal of Medicine | 37.909 | 933  | 24/1/2020 | Editorial/Comment/Letter/News/Expert opinion/Essay | R.D.  | V          | Describe the use of different diagnostic methods: bronchoalveolar-lavage fluid, RNA extracted from bronchoalveolar-lavage fluid and culture supernatants.                                                                                                                                          |

**SOCIAL MEDIA INTERCTIONS  
(95% quantile: 5,736.85)**

| ID  | DOI                           | Number of social media interactions | Title                                                                                                                                               | First Author | Country of first author affiliation | Journal                         | Journal IF | Journal H-index | Publication date | Paper type                                         | Data source | Topics   | Aim of the paper                                                                                                                                                                                                                                                                                   |
|-----|-------------------------------|-------------------------------------|-----------------------------------------------------------------------------------------------------------------------------------------------------|--------------|-------------------------------------|---------------------------------|------------|-----------------|------------------|----------------------------------------------------|-------------|----------|----------------------------------------------------------------------------------------------------------------------------------------------------------------------------------------------------------------------------------------------------------------------------------------------------|
| 1*  | 10.1016/S0140-6736(20)30183-5 | 45197                               | Clinical features of patients infected with 2019 novel coronavirus in Wuhan, China                                                                  | Huang C      | China                               | Lancet                          | 43.377     | 700             | 24/1/2020        | Cohort study                                       | D.C.D       | C        | Report the epidemiological, clinical, laboratory, and radiological characteristics and treatment and clinical outcomes of patients affected by COVID-19.                                                                                                                                           |
| 16* | 10.1056/NEJMoa2001191         | 21627                               | First Case of 2019 Novel Coronavirus in the United States                                                                                           | Holshue ML   | USA                                 | New England Journal of Medicine | 37.909     | 933             | 31/1/2020        | Case Report/Case Study                             | D.C.D       | C, D, T  | Describe the identification, diagnosis, clinical course, and management of the case, including the patient's initial mild symptoms at presentation with progression to pneumonia, of the first case of 2SARS-CoV-2 infection confirmed in the USA.                                                 |
| 3*  | 10.1016/S0140-6736(20)30211-7 | 20758                               | Epidemiological and clinical characteristics of 99 cases of 2019 novel coronavirus pneumonia in Wuhan, China: a descriptive study                   | Chen N       | China                               | Lancet                          | 43.377     | 700             | 30/1/2020        | Cross-sectional study/Descriptive                  | D.C.D       | C, D     | Improve the knowledge about the epidemiology and clinical features of pneumonia caused by SARS-CoV-2.                                                                                                                                                                                              |
| 15* | 10.1001/JAMA.2020.1585        | 18643                               | Clinical Characteristics of 138 Hospitalized Patients With 2019 Novel Coronavirus-Infected Pneumonia in Wuhan, China.                               | Wang D       | China                               | JAMA                            | 14.777     | 622             | 7/2/2020         | Case-control study                                 | D.C.D       | C, T, TR | Investigate clinical characteristics of hospitalized patients with COVID-19 in Wuhan, China                                                                                                                                                                                                        |
| 7*  | 10.1001/JAMA.2020.0757        | 16826                               | Coronavirus Infections-More Than Just the Common Cold.                                                                                              | Paules CI    | USA                                 | JAMA                            | 14.777     | 622             | 23/1/2020        | Editorial/Comment/Letter/News/Expert opinion/Essay | R.D.        | GD       | Description of the outbreak, transmission, clinical symptoms and economical costs.                                                                                                                                                                                                                 |
| 14* | 10.1016/S0140-6736(20)30260-9 | 11451                               | Nowcasting and forecasting the potential domestic and international spread of the 2019-nCoV outbreak originating in Wuhan, China: a modelling study | Wu JT        | China                               | Lancet                          | 43.377     | 700             | 31/1/2020        | Other                                              | O.D.        | E, TR    | Estimate of the size of the epidemic in Wuhan on the basis of the number of cases exported from Wuhan to cities outside mainland China and forecast the extent of the domestic and global public health risks of epidemics, accounting for social and non-pharmaceutical prevention interventions. |

|     |                               |      |                                                                                                                                                     |           |         |                                 |        |     |           |                                                         |       |            |                                                                                                                                                                   |
|-----|-------------------------------|------|-----------------------------------------------------------------------------------------------------------------------------------------------------|-----------|---------|---------------------------------|--------|-----|-----------|---------------------------------------------------------|-------|------------|-------------------------------------------------------------------------------------------------------------------------------------------------------------------|
| 2*  | 10.1016/S0140-6736(20)30154-9 | 8769 | A familial cluster of pneumonia associated with the 2019 novel coronavirus indicating person-to-person transmission: a study of a family cluster.   | Chan J    | China   | Lancet                          | 43.377 | 700 | 24/1/2020 | Case Report/Case Study                                  | D.C.D | E, V, C, D | Investigate the person-to-person or nosocomial transmission of SARS-CoV-2.                                                                                        |
| 18  | 10.1001/JAMA.2020.1490        | 7751 | 2019 Novel Coronavirus—Important Information for Clinicians                                                                                         | del Rio C | USA     | JAMA                            | 14.777 | 622 | 5/2/2020  | Editorial/Comment/Letter/News/Expert opinion/Essay      | R.D.  | P          | Report how the management of infection has been largely supportive.                                                                                               |
| 8*  | 10.1056/NEJMc2001468          | 7030 | Transmission of 2019-nCoV Infection from an Asymptomatic Contact in Germany                                                                         | Rothe C   | Germany | New England Journal of Medicine | 37.909 | 933 | 30/1/2020 | Case Report/Case Study                                  | D.C.D | TR         | Report a case of SARS-CoV-2 infection acquired outside Asia in which transmission appears to have occurred during the incubation period in the index patient.     |
| 12* | 10.1002/jmv.25682             | 6687 | Homologous recombination within the spike glycoprotein of the newly identified coronavirus may boost cross-species transmission from snake to human | Wei Ji    | China   | Journal of Medical Virology     | 2.066  | 105 | 22/1/2020 | Clinical trial, RCT, in vitro or in vivo study/Genomics | D.C.D | V          | Since many patients were potentially exposed to wildlife animals at the Wuhan seafood wholesale market, the authors want to analyse the possible virus reservoir. |
| 9*  | 10.1056/NEJMoa2001017         | 6349 | A Novel Coronavirus from Patients with Pneumonia in China, 2019                                                                                     | Zhu N     | China   | New England Journal of Medicine | 37.909 | 933 | 24/1/2020 | Editorial/Comment/Letter/News/Expert opinion/Essay      | R.D.  | V          | Describe the use of different diagnostic methods: bronchoalveolar-lavage fluid, RNA extracted from bronchoalveolar-lavage fluid and culture supernatants.         |

**CAPTURES**  
(95% quantile: 1.45)

| ID  | DOI                           | Number of captures | Title                                                                                                                                                   | First Author | Country of first author affiliation | Journal                                      | Journal IF | Journal H-index | Publication date | Paper type                                              | Data source | Topics       | Aim of the paper                                                                                                                                                                                                           |
|-----|-------------------------------|--------------------|---------------------------------------------------------------------------------------------------------------------------------------------------------|--------------|-------------------------------------|----------------------------------------------|------------|-----------------|------------------|---------------------------------------------------------|-------------|--------------|----------------------------------------------------------------------------------------------------------------------------------------------------------------------------------------------------------------------------|
| 6*  | 10.1016/j.ijid.2020.01.009    | 161                | The continuing 2019-nCoV epidemic threat of novel coronaviruses to global health - The latest 2019 novel coronavirus outbreak in Wuhan, China.          | Hui DS       | China                               | International journal of infectious diseases | 3.420      | 73              | 14/1/2020        | Editorial/Comment/Letter/News/Expert opinion/Essay      | O.D.        | GD, E, TR, P | Describe the SARS-CoV-2 outbreak in Wuhan, China.                                                                                                                                                                          |
| 5*  | 10.1002/jmv.25678             | 58                 | Outbreak of pneumonia of unknown etiology in Wuhan, the mystery and the miracle                                                                         | Lu H         | China                               | Journal of Medical Virology                  | 2.066      | 105             | 16/1/2020        | Editorial/Comment/Letter/News/Expert opinion/Essay      | O.D.        | E            | Commentary about the outbreak and the similarities with other coronavirus.                                                                                                                                                 |
| 19  | 10.1016/j.meegid.2020.104212  | 22                 | Full-genome evolutionary analysis of the novel corona virus (2019-nCoV) rejects the hypothesis of emergence as a result of a recent recombination event | Paraskevis D | Greece                              | Infection, Genetics and Evolution            | 2.670      | 74              | 29/1/2020        | Clinical trial, RCT, in vitro or in vivo study/Genomics | R.D.        | V            | Characterize the genetic relationships of the SARS-CoV-2 and to search for putative recombination within the subgenus of sarbecovirus.                                                                                     |
| 20  | 10.1093/jtm/taaa008           | 20                 | Pneumonia of Unknown Etiology in Wuhan, China: Potential for International Spread Via Commercial Air Travel                                             | Bogoch II    | Canada                              | Journal of travel medicine                   | 2.078      | 51              | 14/1/2020        | Editorial/Comment/Letter/News/Expert opinion/Essay      | R.D.        | GD, E, TR    | Evaluate the potential for international dissemination of this disease via commercial air travel should the outbreak continue.                                                                                             |
| 21  | 10.1016/S0140-6736(20)30212-9 | 19                 | Offline: 2019-nCoV outbreak—early lessons                                                                                                               | Horton R     | Uk                                  | Lancet                                       | 43.377     | 700             | 02/01/20         | Editorial/Comment/Letter/News/Expert opinion/Essay      | -           | GD           | Inform about some early important elements of the management of this global health emergency.                                                                                                                              |
| 10* | 10.1002/jmv.25681             | 18                 | Emerging coronaviruses: Genome structure, replication, and pathogenesis                                                                                 | Chen Y       | China                               | Journal of Medical Virology                  | 2.066      | 105             | 22/1/2020        | Systematic Review/Meta Analysis/Non Systematic Review   | R.D.        | V            | Perform a brief introduction of the general features of CoVs and describe diseases caused by different CoVs in humans and animals.                                                                                         |
| 22  | 10.1002/jmv.25683             | 15                 | Global health concerns stirred by emerging viral infections.                                                                                            | Luo GG       | USA                                 | Journal of Medical Virology                  | 2.066      | 105             | 22/1/2020        | Editorial/Comment/Letter/News/Expert opinion/Essay      | R.D.        | GD           | Describe the history of emerging viral infections that were a major threat to global public health: avian influenza A, severe acute respiratory syndrome (SARS), the Middle East respiratory syndrome (MERS) and now nCoV. |
| 12* | 10.1002/jmv.25682             | 12                 | Homologous recombination within the spike glycoprotein of the newly identified coronavirus may boost cross-species transmission from snake to human     | Wei J        | China                               | Journal of Medical Virology                  | 2.066      | 105             | 22/1/2020        | Clinical trial, RCT, in vitro or in vivo study/Genomics | D.C.D       | V            | Since many patients were potentially exposed to wildlife animals at the Wuhan seafood wholesale market, the authors want to analyse the possible virus reservoir.                                                          |
| 23  | 10.1136/bmj.m308              | 7                  | China coronavirus: what do we know so far?                                                                                                              | Mahase E     | UK                                  | BMJ                                          | 5.476      | 392             | 24/1/2020        | Editorial/Comment/Letter/News/Expert opinion/Essay      | R.D.        | GD           | Inform what is known so far about n-CoV                                                                                                                                                                                    |
| 24  | 10.1136/bmj.m349              | 3                  | China coronavirus: partial border closures into Hong Kong are not enough, say doctors                                                                   | Parry J      | Canada                              | BMJ                                          | 5.476      | 392             | 29/1/2020        | Editorial/Comment/Letter/News/Expert opinion/Essay      | R.D.        | GD, P        | Describe the critical containment measures.                                                                                                                                                                                |

| <b>25</b>                            | 10.1136/bmj.m343      | 2                       | Chinese premier rallies medics in coronavirus fight       | Moberly T           | UK                                         | BMJ                             | 5.476             | 392                    | 28/1/2020               | Editorial/Comment/Letter/News/<br>Expert opinion/Essay | R.D.               | GD            | Report the visit of China's premier, Li Keqiang, to the Wuhan Jinyintan Hospital this week to see the team's work to control the outbreak of the novel coronavirus in the area.                                                                   |
|--------------------------------------|-----------------------|-------------------------|-----------------------------------------------------------|---------------------|--------------------------------------------|---------------------------------|-------------------|------------------------|-------------------------|--------------------------------------------------------|--------------------|---------------|---------------------------------------------------------------------------------------------------------------------------------------------------------------------------------------------------------------------------------------------------|
| <b>USAGE<br/>(95% quantile: 0.0)</b> |                       |                         |                                                           |                     |                                            |                                 |                   |                        |                         |                                                        |                    |               |                                                                                                                                                                                                                                                   |
| <b>ID</b>                            | <b>DOI</b>            | <b>Number of usages</b> | <b>Title</b>                                              | <b>First Author</b> | <b>Country of first author affiliation</b> | <b>Journal</b>                  | <b>Journal IF</b> | <b>Journal H-index</b> | <b>Publication date</b> | <b>Paper type</b>                                      | <b>Data source</b> | <b>Topics</b> | <b>Aim of the paper</b>                                                                                                                                                                                                                           |
| 16*                                  | 10.1056/NEJMoa2001191 | 15                      | First Case of 2019 Novel Coronavirus in the United States | Holshue ML          | USA                                        | New England Journal of Medicine | 37.909            | 933                    | 31/1/2020               | Case Report/Case Study                                 | D.C.D              | C, D, T       | Describe the identification, diagnosis, clinical course, and management of the case, including the patient's initial mild symptoms at presentation with progression to pneumonia, of the first case of SARS-CoV-2 infection confirmed in the USA. |
